# Supplementary material for: Fur glowing under UV: a widespread consequence of porphyrin accumulation in mammals
Source: Research Square preprint supplement (doi:10.21203/rs.3.rs-499384/v2), 2021-05-14
Supplement: Supplementary file 1 [file de0e92f69065dab17b7fbf78.xls]

## Sheet: Emission spectra (Fig. 1b)
wavelength (nm)	Callithrix argentata NRM_617493	Glaucomys sabrinus NRM_875246	Glaucomys volans ZMB_Mam_60634	Lepus timidus NRM_588837	Mustela erminea NRM_20175124	Erinaceus europaeus NRM_594242	Monodelphis brevicaudata JAGUARS-M2962	Marmosa murina JAGUARS-M535	Ornithorhynchus anatinus ZMB_Mam_35991
425	166966	54555.1	267470	176764	454623	54032.4	19300.5	78068.3	229926
426	174119	57144.1	253274	183553	493209	51013.5	18030.5	78059.8	224334
427	181307	59556.3	247506	189548	532942	52856.3	17512.1	78942.5	223170
428	188479	62080.2	247642	196324	573065	55691.9	17622.5	81432	225459
429	195262	64536.7	250505	202504	611122	58827.8	18020.8	83981.8	230031
430	202369	66962.3	256242	208512	653245	62197.2	18848.6	87246.1	236610
431	209004	69401.3	262550	214777	695306	65302.2	19648.2	90428.2	242595
432	216506	71698.8	269783	220870	738335	69177.8	20523.8	94106.7	250364
433	223335	74345.3	276784	226824	779536	72699.8	21527.6	97247.1	257447
434	230156	76870.5	283877	233158	821659	76756.7	22467.4	101258	264763
435	235950	79068.7	290883	238677	858940	80192.3	23436.3	104564	271967
436	243466	81653.6	297794	244729	903570	84395.8	24561.9	108536	278998
437	249619	83475.6	303944	250189	947024	88652.8	25455	112355	285730
438	256368	85611.9	310633	255635	987287	92586.9	26563.4	115652	293738
439	262316	87632.2	316446	260952	1.02629e+06	96419.8	27605	119461	300005
440	268719	89922.9	322512	265808	1.06033e+06	101158	28548.8	122618	306362
441	273351	91710	327915	270246	1.09822e+06	104718	29677.7	125699	312364
442	279411	93502.5	332424	274099	1.13221e+06	108681	30392	129221	318698
443	283870	95447.9	336753	278749	1.16144e+06	113050	31538.5	132280	324913
444	289690	97503.2	341522	281804	1.19501e+06	116717	32555.2	135349	331037
445	295111	98775.9	345210	282590	1.22571e+06	120207	33580.1	138818	336423
446	299608	100724	349826	284454	1.25382e+06	124139	34722.5	142460	343466
447	305374	101853	353285	288064	1.28636e+06	128040	35660.8	145924	349293
448	310339	103755	358035	291730	1.31379e+06	131574	36755.7	149414	354610
449	315122	104765	361994	294968	1.34474e+06	134742	37832.1	152535	360981
450	319531	106032	364992	297544	1.36793e+06	137643	38948.9	156090	366153
451	324040	107564	367907	300632	1.38913e+06	141775	39710.8	159242	371921
452	328465	108325	370704	302324	1.4104e+06	144160	40690.8	162386	376519
453	331447	110000	372281	304849	1.42755e+06	146940	41744.7	165435	381190
454	334786	110454	374346	306177	1.44323e+06	150495	42703.2	167833	384969
455	338658	112046	376265	307985	1.46296e+06	153708	43526.2	171058	389425
456	342120	112938	376864	309054	1.48159e+06	156580	44382	173670	393164
457	345040	113351	378808	310697	1.49473e+06	159834	45377.8	176913	397362
458	347758	114792	379683	310696	1.51354e+06	161578	46335.4	179803	400946
459	350237	114762	381114	312662	1.52317e+06	164174	47246.1	182622	404825
460	352528	114324	382939	312969	1.52972e+06	166221	48400.8	185635	408991
461	355469	114145	384779	315136	1.54021e+06	167678	49176.6	189165	413465
462	358204	113661	386781	315869	1.54543e+06	169112	50316.2	192339	418413
463	359983	113256	388354	316883	1.54786e+06	170447	51349.4	195627	422461
464	362211	112400	390386	317865	1.55351e+06	170743	52344	198904	426843
465	363950	112026	390595	317931	1.55463e+06	171813	53143.6	202521	430086
466	365491	111396	391131	318013	1.55703e+06	172704	53862	205070	433276
467	366459	110740	390799	316871	1.55443e+06	173451	54641.3	207370	436225
468	366562	109398	390593	316248	1.55396e+06	173387	55472	209242	438301
469	367671	108792	389784	314602	1.5495e+06	173428	56199.4	211637	439862
470	367727	107710	388081	313646	1.54397e+06	173488	56677.3	214003	441194
471	367275	106116	387614	312409	1.53728e+06	173554	57387.3	216157	443389
472	367686	106241	386684	311798	1.5356e+06	173974	57823	218519	444667
473	368291	104918	385570	310440	1.5302e+06	173635	58467.1	220505	446699
474	367724	103725	384230	308861	1.52113e+06	173754	59108.8	222051	447762
475	366657	102683	382002	306872	1.51247e+06	173456	59665.7	223401	448725
476	367255	102172	380664	305158	1.50263e+06	172790	59718.8	225133	449586
477	365730	100814	378140	303406	1.49036e+06	171852	60231.5	226730	450033
478	365076	99800.2	376194	301082	1.48066e+06	171328	60398.8	227748	450970
479	363973	98217.2	373637	298627	1.46767e+06	171171	60811.1	228951	451124
480	363218	97655.4	371811	297080	1.45385e+06	170414	60965	230060	450555
481	360999	96662.8	368559	294582	1.44273e+06	169744	61233	230867	450758
482	359579	95726.1	366178	292217	1.43015e+06	168767	61099.1	231806	450780
483	358287	94228.7	363489	289594	1.41366e+06	167745	61197.6	233045	450632
484	357099	92828.5	361483	287760	1.399e+06	167557	61410.5	233772	450878
485	355317	91664.2	358450	284769	1.38678e+06	166572	61357.1	234927	449851
486	354033	91186.9	356400	282921	1.3682e+06	164882	61384.6	235433	450091
487	351801	89748.6	353113	279597	1.35709e+06	164242	61196	235608	448840
488	350532	88810.4	349950	277357	1.3367e+06	162847	61152.7	235868	448949
489	348720	87446.6	347186	274532	1.32216e+06	162379	61186.3	236296	448163
490	346627	86277.2	344417	272175	1.30361e+06	161463	60997.9	236592	447042
491	344227	85173.4	341270	268713	1.29002e+06	160210	60602.8	236806	446193
492	341460	84017	338348	266087	1.27416e+06	158738	60412.6	237501	444823
493	340593	82697.4	334936	263839	1.25714e+06	156824	60221.4	237673	444421
494	338387	81438.1	332030	260553	1.23831e+06	154921	59930.9	237241	442816
495	336285	80636.1	329153	258000	1.22259e+06	154656	59470.6	237635	442487
496	333358	79397.8	326386	256002	1.20412e+06	153245	59495.6	237400	440750
497	331798	77973.8	323192	252958	1.18495e+06	152178	58796.1	237472	439944
498	329183	76916	320308	250074	1.16987e+06	150713	58596.5	237102	439108
499	326480	75685.9	317185	247363	1.1537e+06	149054	58587.2	237271	437166
500	324474	74313.3	314193	244510	1.13558e+06	147369	58245	237033	435958
501	322407	73343.9	310568	242108	1.11928e+06	146411	57773.5	236800	434136
502	319222	72347.4	306995	238571	1.09947e+06	144662	57754.1	236497	432381
503	316573	71008.6	303945	235423	1.07699e+06	143251	57533	235746	430848
504	313985	69361.9	300184	232361	1.06495e+06	141585	57088.8	235061	428010
505	311098	68329.5	296663	229094	1.04613e+06	140027	57126.2	235036	426259
506	307553	67072	293142	225672	1.02263e+06	138394	56705.8	234623	424464
507	304864	65856.4	289854	223067	1.00504e+06	136872	56560.5	234134	422368
508	302278	65094.5	286222	219853	986434	135265	56650.8	233471	420159
509	299735	63503.3	282737	216809	967172	133535	56278.2	232824	417891
510	295989	62006.9	279531	213737	948735	131891	56345.8	231868	415423
511	293228	61283.9	276520	210396	929942	131045	56066.4	231419	414037
512	290498	60115.1	272394	207532	914385	129289	55924.4	230788	411521
513	287023	58979.9	268905	204263	893656	127377	55859.9	229838	408441
514	284909	57271.3	265270	200866	875265	125917	55577.8	228750	406103
515	280281	56513.3	261817	198237	863585	124222	55408	228102	403353
516	277708	55077.7	258826	194575	839371	122498	55079.9	227026	401280
517	274335	53941	255245	191827	821099	120831	54968.5	225396	397952
518	271696	53001.4	251816	189233	807429	119296	54650.7	224407	395275
519	267807	51830.1	248444	185787	790385	117748	54152.5	223413	392861
520	264725	50930	244328	183109	770369	115619	53787.2	221887	389516
521	262021	49536.1	241406	179787	751879	114549	53358.4	220360	387003
522	259207	48572.6	238712	177414	743697	112680	52886	219170	384487
523	256832	47534.9	235285	174726	724073	111237	52374.4	218132	382734
524	253953	46212.5	232628	172120	710149	108978	51714.7	217135	378959
525	251914	45546.7	229806	169828	698710	107158	51308.4	215753	377133
526	248857	44490.6	226756	167314	682688	105271	50796.2	213933	374288
527	246092	43770	224125	165014	668125	103989	50095.2	212559	372962
528	242789	42782.7	221062	162775	656509	102373	49395.4	210669	369518
529	239883	41694.1	218124	160241	643271	100637	48797.1	210009	367187
530	237249	40633	215656	157394	629884	98829.2	48339.8	207692	364103
531	235299	40063.4	213298	155184	615676	97350.1	47857.1	206608	362088
532	231837	38926.8	209688	152741	602335	95560.3	46722.9	204788	358985
533	229298	38299.9	206686	150539	588211	94085.3	46444.3	202872	355959
534	226307	37082.6	204407	148223	573034	91857	45818.4	201606	353305
535	223779	36491.4	201222	145751	565641	89933.6	45289.9	199790	350286
536	221381	35568.4	198797	143876	549245	88130.3	44624	198320	348158
537	217473	34863.4	196368	141228	541079	87256.2	44297.4	196148	344887
538	215268	34117.6	193839	138643	527585	85371.6	43707.3	195378	342834
539	212407	33369.1	190983	136860	515857	84115.6	43245.4	193511	339438
540	209785	32328.5	187974	134433	502956	82171	42883.7	191694	336777
541	207642	31691.7	185764	132695	493659	80848.1	42496.4	190703	333697
542	205332	31209.4	182875	130367	482991	79170.5	42349.5	189422	330480
543	201328	30305.5	179746	128311	469892	78142.4	42044.6	187650	327550
544	198754	29640.4	177054	125769	458376	75934.1	41983.5	186004	323987
545	197027	28810.8	174064	124010	449827	74842.2	41792.5	185186	321468
546	194280	28050.1	172077	121867	442296	73609.2	41509.1	183779	318866
547	191397	27327.5	169720	119791	431387	72230.9	41596.6	182633	315979
548	189065	26623.9	167234	117854	420673	71369.5	41210.7	181780	313002
549	186821	26140.7	164767	115553	410527	69622.5	41063.4	180297	309857
550	184264	25444.8	162499	113810	403065	68495.1	40938.8	179216	307007
551	181407	24722.9	160173	111640	393477	67148.2	40834.3	177770	304509
552	179972	24167.1	157943	109813	383575	65750.2	41042.5	176912	302388
553	177530	23618.8	155489	108789	375575	64720.7	40693	175554	299626
554	174255	22738.7	153271	106502	366793	63339.2	40441.2	174912	296070
555	172560	22353.6	150631	104567	358662	61683.5	40415.1	173121	293491
556	170405	21777	148082	102190	348891	60444.2	39991.6	171810	289174
557	167195	20935.3	146151	100581	339533	59043.6	40023.5	170102	286352
558	164178	20462.4	143124	98523.5	329802	57861.1	40031.4	168757	282008
559	161655	19968	140327	96402.9	322123	56548.7	40007.5	167489	278685
560	159296	19463.5	138642	94963.3	314217	55637.4	40329	166247	275569
561	156687	18961.8	136663	93304.9	304922	54247.7	40814.2	166004	272338
562	154809	18498.3	133848	91545.3	298971	53004.6	41303.4	165188	270404
563	151584	17886.6	132518	89915.4	292938	52133.8	42495.4	164678	266843
564	150570	17397.3	130284	88242.1	285245	51254.9	44099.5	164840	264112
565	147357	16896.4	127969	87090.8	278525	50036.1	45970	165216	260573
566	145154	16471.2	125715	84881.4	269817	48979.4	48094.4	165880	256970
567	142093	15999.2	122862	82817.6	260436	47946.8	51507	166462	253321
568	140221	15384.8	120761	81280.3	253783	47330.1	55037.8	168220	249190
569	137999	15071.2	118738	79522.8	246721	46529.9	59159.2	170662	246460
570	135613	14708.3	116603	77872.5	240726	46042.9	64223	172989	242404
571	133499	14315	114922	76310.9	234592	45292.1	69353.6	176085	239932
572	130605	14106.3	113333	75128.5	229333	45285.1	75056.5	180141	237127
573	128894	13542.1	110981	73558	222677	44862.2	81107.3	183651	234024
574	127455	13203.6	109502	72016.1	218646	44473.4	87145.5	187988	230834
575	125522	12919.1	107824	70950.8	211598	44418	93376.7	191027	228397
576	123253	12410.8	106372	69763.2	206464	44259.2	98825.7	194519	225572
577	121334	12199.6	104552	68217.5	202916	44065.2	103459	197191	222391
578	119049	11922.6	102706	67228.4	197989	43641.1	107047	198632	219058
579	117347	11613.4	101656	65728.2	194043	43424.9	110096	199891	216920
580	115851	11344.6	99751	64551.6	187897	43295.2	111724	200235	213635
581	114246	11117	98162.1	63153.3	182213	42805.2	112470	199573	210699
582	112147	10844.2	96729.6	62096.8	176769	42138.1	112744	197554	208021
583	110338	10514.5	94967.1	60608.5	173979	41716.5	111674	195380	204954
584	108941	10414.8	93647.2	59744.7	169017	40868	109447	193680	203347
585	107179	10019.1	92614.8	58661.8	164444	39909.4	106882	190291	201129
586	105184	9867.03	91500.8	57402.3	161622	38998.2	104076	186255	198085
587	102930	9561.96	89915.2	56920.2	157761	38297.6	100262	182647	195558
588	102144	9382.76	88990.8	55331.6	152578	37471.6	96194.6	178462	193163
589	100361	9142.67	87312.8	54980.1	149409	36447.9	92818.6	173949	190556
590	99048.1	8954.63	86457.9	53710.5	145643	35595.2	88946.4	170701	187711
591	97763.1	8705.99	84999.7	52815.3	143266	34562.4	85639.7	167027	185304
592	95459.4	8580.69	84075.1	51584.5	139825	34004.6	83058.4	163668	183232
593	94178.7	8401.58	83214.2	50947.8	135780	33242	80915.6	161489	180073
594	93399	8224.33	82087.8	49667	131993	32428.2	79157.4	159493	178616
595	91796.8	8088.83	81306.1	48766	129833	32162.3	78139.8	157837	176338
596	90071.9	7954.71	80407.2	48017.3	125266	31254.7	77767.9	155802	173645
597	88696.5	7787.95	79177.3	47235.3	123695	30779.9	78549.6	156178	171712
598	87860.1	7614.92	78416.6	46441.2	119778	30363.6	80620.7	156222	168790
599	86375.4	7594.2	77531.8	45245.8	117278	30191.5	83140.2	156792	166662
600	84346.4	7258.3	76721.2	44260.4	115293	29612.4	86413.7	159013	165003
601	84035.2	7173.84	75775.3	43601.8	111126	29535.4	91227.1	161860	162244
602	82054.6	7064.25	74894.5	42893.3	110251	29178.9	98421.1	165215	160230
603	80230.4	6956.37	74553.8	42376.9	106499	29563.1	106887	170408	157959
604	79266.5	6899.4	73685.3	40998	103445	30060.6	117977	176209	155257
605	78442.5	6774.95	73555.1	40560.1	100820	30108.5	131547	184555	153511
606	76906.6	6687.2	73078.8	39542.6	98258.9	30816.6	148522	194256	151714
607	75547.2	6802.19	73024.4	38861.3	96490.8	31815.3	168835	207059	149016
608	74319.6	6723.17	72803.8	38600.3	93754.5	33189.9	195444	222476	147030
609	73325.8	6639.32	73331.5	37589.2	91978	34509.5	224511	242164	144734
610	72214	6643.36	74111.3	37048.1	88966.1	36674.7	261458	263923	142775
611	70695.1	6918.57	75546.1	36271.9	87406.5	39589.7	301373	289786	141047
612	69014.8	7061.18	76676.6	35432.6	85432.8	43029.3	348024	318525	139158
613	67779.5	7415.67	79065.1	34536.3	83056.3	47658	397895	349946	136502
614	66699.7	7607.68	81686.4	33860.8	81146	52779.1	450965	382810	134137
615	65217.5	8171.09	85763.7	33433	79065.2	58799.6	505953	416033	132002
616	64075.7	8729.47	90261.7	32949.4	77371.7	65857.4	558910	450221	129585
617	63488.5	9404.81	95566.3	31915	74320.7	73297.6	610042	482533	128539
618	62105.8	10394.2	102666	31186	72075.4	81630.9	659124	513952	126216
619	61106	11497.5	110394	30642.1	70854.8	90952.5	700181	540000	123865
620	59507	12562	118691	29947.7	68444.5	99996.1	732132	560061	122343
621	58744.8	14111.1	128765	29252.9	66763.7	110390	756365	576459	119769
622	57486	15592.1	138938	28789.4	64489.5	120220	769437	584829	117908
623	56230.2	17195.4	149160	28487.3	63382.2	129475	771600	587346	116275
624	55308.5	18795	160622	27604.8	61175	139938	764715	585301	114611
625	53733.4	20276.3	172516	26876.8	59971.3	149461	750499	579172	112486
626	53246.6	21859	186068	26368	58940.4	159028	728175	568006	110626
627	52289.3	23408.5	198479	26068.7	56690.4	168205	700297	553292	108365
628	51311	24905.5	211993	25595.2	54651.9	176980	671700	540581	106347
629	50170.8	25965.3	224525	25182.3	55209.8	185037	642974	525811	105485
630	49628	27329.4	238772	24831.5	53432.1	191103	617494	514736	103446
631	48468.6	28560.2	252215	24257.4	50923.5	194758	591167	505396	102236
632	47896.6	29659.2	267022	23925.5	50525.9	196245	570311	497121	100737
633	47391.1	31218.8	283482	23012.7	49717.6	195219	552653	491912	99996.6
634	46823.9	32321.8	300151	22593.4	48794.1	189739	537506	488102	97501.7
635	45450.9	33427.2	316916	22449.7	46036.9	182651	527987	486650	95928.7
636	44925.1	34800.8	334992	22199.4	45583.5	172099	521618	486960	94680.8
637	44494.7	35907.8	352669	21735.4	44266.9	161145	517708	489268	93145.4
638	43212.7	37415	373750	21317.5	43503	151098	517556	491626	91859.3
639	42255.3	38657.5	394368	20961.3	42169	140076	519186	494907	90954.8
640	41550.7	40320	416085	20351.1	41641.8	130073	521956	499045	88967.5
641	41395.9	42069.9	440167	20234.8	40512.1	121682	524861	500911	88677.1
642	40881.2	43579.6	463271	19863.6	40320.1	114881	527819	503785	87606.3
643	40155.6	45521.3	485088	19890	38941.4	109765	533333	505862	86515.3
644	39154.1	47232.9	507305	19341.3	37774.4	106141	533996	506759	85254.9
645	38330.1	49299.7	528278	19023.9	36303.3	102831	534570	502390	84149.6
646	38086.9	50707.1	544956	18712.6	35670.2	100563	530402	496987	82936.2
647	37246.6	51805.4	558126	18484.3	33701.4	99788.4	526987	489154	81541.7
648	36291.1	53165.9	569398	18205.9	32705.9	98153.5	519552	480353	79421.6
649	35592.6	54634.3	576420	17492.5	33002.7	97496	511787	467914	78033.3
650	34938	55624.2	583584	17215.1	31930.8	97257.2	500905	455589	76210.4
651	34064.2	55906.4	587920	16861.1	31078	97117.3	490471	444407	74262.2
652	33485.2	56181.8	589165	16544.9	30533.4	96961.7	481938	432273	73154.5
653	32561.4	56358.2	588599	16234.1	29478.9	96639.4	470836	419389	71687.3
654	31856.6	56001.9	588283	16026.4	29472.5	96695.6	459476	405971	69630.2
655	31829.9	55938.2	584706	15725.2	28472.1	96360.9	452363	395059	68507.3
656	31015.5	55280.2	582296	15436.8	28226.2	96419.5	442289	386609	67583.4
657	30563.1	54761.1	577431	15202.3	27666.1	96507.7	434328	376891	66339.1
658	29482.4	54188.7	573669	15270.9	27631.2	96468.3	426376	368291	65106
659	29794.9	53861.8	570959	15155.3	25129.2	96408.7	421443	361874	63971.2
660	28757.6	53051.6	566361	14825	26224.4	96616.8	416480	355812	63112.7
661	28383	52677.9	559289	14819.5	25071.2	96890	413595	349032	62171.3
662	27629.2	52665.8	552835	14854.8	24585.3	97729.7	413528	346583	61055.9
663	27434.9	52329.8	549164	14480.2	23823	98266.1	413654	344324	60289.7
664	26409.3	52150	543293	14284.8	24033.7	98296.8	415729	341170	58854.1
665	26227.8	51535.3	536028	14105.5	22542.6	98457.6	417668	343110	58067.4
666	25804	51817.2	531589	14284.5	21898.4	98579.6	423268	342828	57013.2
667	25318.9	51224.8	524813	13909.9	21539.8	98340.7	427617	344058	56101.2
668	24306.9	50175.4	516293	13804.8	21419.5	97894.8	434026	345717	54881.9
669	24829.9	49471.9	511948	13707.8	20047.2	96890.6	441343	346977	53882.3
670	23970.8	48532.3	504271	13513.1	19984.9	95916.8	449531	351251	53206.8
671	23722.8	47400.5	495859	12958.5	19505.9	94623.6	459173	354145	51904.9
672	23019.8	45735.7	486777	13154.4	18827.8	93197.7	468768	357823	50929.2
673	22391.2	44642.2	479069	12938.1	18676.9	91184	478509	363088	50358.4
674	22314.4	42928.8	470510	12569.1	18041.3	89138.8	489209	369420	49311.4
675	22071	41435.9	460708	12363.7	17231.6	86907	501245	374606	48412.4
676	20670.2	39470	453715	11912.5	17055	84740.9	511935	379714	48020.9
677	20956.2	38299.2	442586	12035.5	17155.3	82476.2	525237	385570	46409.5
678	20055.5	36257.5	433259	11671.8	15710.2	80206.8	537172	391681	46646.4
679	20178.1	34969.3	424958	11416	15793.7	78549.9	550959	397670	45168.1
680	19892.3	33224.8	414678	10953.4	15309.6	76604.9	564396	405170	44283.3
681	19305.8	31807.1	407367	10536	14615.1	74869.8	574489	409978	43573.2
682	18870.7	30326.4	400395	10651.8	15536.5	73179.4	583755	413883	42952.8
683	18623.5	29362.6	389050	9902.06	14395.2	71729.8	590355	417868	41835.6
684	18126.7	28125.2	383773	9867.98	13521.4	70415.3	597086	420662	41477.5
685	17277.1	27196.1	376700	9660.96	14191.7	69271.5	599341	420690	40899.8
686	17542.6	26057.5	372188	9804.74	12903.1	67838	598216	422163	40454
687	16635	24993.4	366001	9216.57	13025	66681.4	595541	418929	39597.6
688	17061.5	24406.6	360221	8875.85	12060.1	65813.1	589872	412846	38683.2
689	17015.4	23108.2	355044	8731.27	12926.5	64368.6	577795	405142	38601.5
690	16674.8	22454.6	350486	8687.35	11898.3	63310	561035	395007	37486.9
691	15744.6	21640.7	344653	8317.2	11663.1	62161.6	542035	384604	37285.6
692	16143	20897	338754	7768.7	11428.5	61080	519360	370260	36860.3
693	15872	20142.5	332668	8140.28	10455.7	59410.1	494801	354448	36334
694	15343.7	19565.9	329132	7907.5	10834	58228.7	466244	338277	34989.7
695	15122.9	18872.7	323557	7555.79	11026	56841.5	440282	320904	34525.5
696	14463	18159.6	317891	7487.15	9992.71	55806.4	414155	306703	33867.9
697	14254.6	17549.6	312229	7418.34	9606.23	54406.5	386683	290656	32920.9
698	14544.6	16815	308135	7074.15	9570.59	53046.2	360693	274199	33115.4
699	13920.3	16365.5	303190	6741.24	9575.29	51036.8	336661	259079	32281.5
700	13659.2	15623.6	297004	6866.66	9800.77	49764.7	313408	247247	31732.8
701	13368.7	14943.1	290345	6772.04	8899.47	48024.2	290432	233141	31110.3
702	12868.3	14543.4	286018	6509.65	8505.48	46358.4	273374	221171	30558.9
703	12958.9	13931.4	277580	6480.01	8837.86	43945.9	255893	209633	30048.1
704	12667.2	13323.5	274429	6467.02	8286.94	41850	240137	200408	30143.8
705	12530.6	13028.7	267689	6233.99	7951.84	39618.7	226853	191318	29353.8
706	11917	12355.1	261545	6274.81	7526.45	37009.6	215625	183091	28474.2
707	11902.6	11803.4	254899	5808.28	8037.3	34806	206068	177375	27905.6
708	11564.6	11416.7	251348	6040.38	7707.51	32463.7	195292	171321	27637.6
709	11895.8	10906.4	244948	6110.27	7895.22	30090	188328	164995	27595.5
710	11033	10439.2	238832	5830.02	7803.79	27612.2	180475	158593	26331.7
711	10814.4	10040.7	232696	5809.2	8108.98	25874.6	173757	153910	26207.5
712	10717.6	9572.36	226146	5675.38	7139.02	23611.9	167142	147588	25513.6
713	10712.6	9146.63	220230	5437.99	7132.57	21675.6	160627	142021	25115.8
714	10378.3	8790.59	213144	5423.44	6773.83	20073	156666	137589	25270
715	10115.4	8359.03	208012	5195.76	6424.77	18509.6	149593	133042	24062
716	9754.47	8020.9	199812	5238.65	6557.35	17114.5	145757	129952	24099.4
717	9559.33	7664.94	195242	5026	6623.25	15853.3	141572	125818	23165.9
718	9562.87	7332.15	190482	4982.6	6306.43	14874.8	136740	121888	22932.5
719	9254.34	7128.3	185302	4650.2	6141.01	13771.4	133012	118131	22590.6
720	8865.39	6866.95	178511	4795.06	5962.46	12772.1	129564	115458	22100.5
721	8959.66	6346.44	172848	4616.18	5608.1	12052.2	126221	111930	21236.5
722	8997.53	6137.4	169875	4410.02	5290.02	11319.9	123085	109435	21419.1
723	8869.74	5937.56	164400	4606.32	6133.21	10716.7	120861	106428	20607.7
724	8557.33	5670.03	158763	4381.11	5624.08	9968.36	117605	102196	20358.8
725	8105.28	5367.23	154504	4197.58	5618.9	9415.32	114699	100011	20024.3
726	8093.01	5152.98	149878	4139.03	5107.56	8885.01	111851	96787.2	19588.5
727	8072.69	4989.56	146340	4051.17	5005.92	8482.2	109412	94879.4	19647.7
728	7671.54	4881.09	140565	4051.85	4174.09	7968.46	106463	91956.1	19134.1
729	7695.75	4611.83	138015	3950.72	4879.79	7683.94	104395	90047.1	18785.5
730	7802.62	4367.5	133924	3955.53	5046.79	7325.16	102738	87260.1	18341.8
731	7508.55	4288.28	129149	4293.1	4228.45	6953.98	100339	86074.5	18205.9
732	7161.25	4129.26	127190	3779.85	4514.64	6622.11	98493.7	84457	18035.2
733	7120.73	3923.16	122536	3975.48	4783.65	6296.99	96629.9	82106.4	17888.7
734	6852.72	3695.03	120043	4019.99	4465.47	6243.07	94739.4	80731	16993.5
735	6903.89	3567.97	116840	4152.46	4323.74	5931.65	92909.5	78745.6	17387.1
736	6525.36	3487.09	114261	3696.94	4305.01	5594.28	90605.7	77524.8	17534.7
737	6493.28	3350.52	110561	3718.37	4085.15	5403.74	89581.9	75612	16958.2
738	6697.17	3191.92	108255	3788.16	3751.44	5253.02	87887.1	73278.9	16725.4
739	6343.49	3095.46	106661	4057.16	2967.5	4935.69	86325.4	73016.4	16584.5
740	6383.79	2903.64	101905	3780.42	3609.31	4715.2	84244.2	71335.9	16912.3
741	6150.67	2747.7	101079	3884.78	3776.79	4618.75	83007.7	68862.7	16149
742	5813.38	2721.18	98303	3937.37	3453.05	4455.03	81835.2	67746	15707
743	6366.91	2571.9	96137	3927.7	3367.56	4242.31	80101.7	67399.3	16430
744	6349.77	2504.13	93262.1	3831.6	2870.27	4143.35	78568.2	65470.7	15341
745	6226.23	2392.48	90946.4	3815.99	2390.27	3929.5	76761.1	64492.8	16043.3
746	5557.11	2294.52	88697.4	3934.55	3315.75	3770.85	75958.9	63129.1	15742.8
747	6047.09	2157.7	87433.7	4316.67	2942.89	3605.12	74810.3	61406.8	14896.9
748	5577.6	2070.23	84754.5	4157.96	2476.21	3431.06	73903.9	60296.6	15607
749	5572.87	2001.41	83204.6	4080.67	2639.44	3281.67	71651.5	58318.1	16217.9
750	5793.99	1875.25	83399.8	4447.47	2396.04	3166.45	68368.9	57969.3	15967.7
751	5237.05	1888.42	79758.3	4594.6	3312.55	3052.71	68594.9	57371.2	16210.3
752	5426.12	1782.12	79575.9	4648.84	2812.07	2956.07	67914.9	54454.8	17034.9
753	5721.94	1697.45	81369.2	5188	2211.09	2821.43	67190.3	54244.3	17941.7
754	5147.38	1596.05	82849.5	5164.8	2818.28	2680.69	65769.7	54902.1	19338.1
755	5969.52	1597.71	83430.8	5572.58	3047.16	2600.35	64272.9	54024.1	21490.1
756	6484.88	1468.17	89195.3	5296.78	3010.5	2464.65	63089	52296	25082
757	5554.11	1434.74	95432.7	5938	1913.38	2358.97	63172.1	54193.6	30100
758	5271.68	1430.66	106381	6778.61	2377.86	2299.17	63734.3	53745.2	35509.4
759	5392.89	1348.14	117062	7022.92	2564.19	2184.16	62912.3	56017.5	43113.7
760	5401.17	1289.87	137172	8023.59	2465.04	2102.38	63221.8	57009.7	52983.1

## Sheet: Excitation spectra (Fig. 2a)
wavelength (nm)	Glaucomys sabrinus NRM_875246 (dorsal, non-glowing)	Glaucomys sabrinus NRM_875246 (ventral, glowing)	Glaucomys volans ZMB_Mam_60634 (ventral, non glowing)	Glaucomys volans ZMB_Mam_60634 (ventral glowing)	Marmosa murina JAGUARS-M535	Monodelphis brevicaudata JAGUARS-M2838	protoporphyrine IX 2H	protoporphyrine IX	Erinaceus europaeus NRM_594242
360	1086.46	7635.74	15276.4	12745.7	6712.17	9706.03	0.805	0.319963	17331.7
361	1193.5	7772.06	15557.9	12977.9	6808.83	10069.4	0.822	0.330567	18095.9
362	1166.88	8093.52	15771.7	13179.1	7030.42	10337.7	0.84	0.341632	19082.6
363	1220.41	8239.74	16047	13438.8	7178.82	10653.6	0.859	0.35408	19582.9
364	1232.71	8433.88	16427	13874.8	7457.9	10946.5	0.878	0.36745	20513.6
365	1318.84	8549.29	16850.1	13963.2	7575.72	11260.1	0.894	0.381282	21283.4
366	1382.01	8668.34	17200	14251.2	7743.09	11638.7	0.911	0.396035	22102.2
367	1337.68	8965.66	17536.2	14422.9	7946.42	12111.7	0.928	0.411249	22927.6
368	1317.15	9039.95	17622.9	14786.3	7998.22	12488.9	0.945	0.426464	23690
369	1382.73	9300.83	18082.7	14952.6	8212.83	12671.9	0.961	0.442139	24454.8
370	1487.97	9397.87	18382.4	15253	8441.29	13011.5	0.976	0.458737	25496.4
371	1403.85	9799.63	18668.4	15502.3	8692.13	13358.7	0.992	0.475334	26218.7
372	1464.01	9794.11	18995.3	15923.3	8840.71	13595.8	1.007	0.492393	27098
373	1497.46	10076.3	19265.4	16019.7	9051.81	13934.4	1.021	0.509451	27576.8
374	1505.86	10154	19574.1	16251.6	9091	14156.6	1.035	0.527432	28564.1
375	1544.37	10153	19789.5	16605.8	9290.88	14392.4	1.049	0.545413	29409
376	1521.03	10394	20236.5	16656.6	9557.51	14668.6	1.061	0.56201	30150.2
377	1587.82	10661.6	20547.6	17011.8	9606.45	14842.7	1.074	0.581374	31040.7
378	1627.1	10922.1	20664.6	17127.7	9825.38	15166	1.085	0.597971	31686.7
379	1676.32	11040.8	20895.4	17398.9	10182.5	15351.1	1.096	0.615952	32223.9
380	1634.34	11190.7	21414.2	17626.5	10102.5	15382.2	1.106	0.63255	32966.6
381	1685.66	11129.4	21694.6	17843.5	10228.3	15696.1	1.117	0.649608	33729.9
382	1741.92	11456.6	22056.3	18240.8	10315.2	15784.1	1.125	0.666206	34366.2
383	1699.9	11488.8	22268.8	18528.4	10525.1	15993.4	1.134	0.680959	34947.8
384	1709.74	11920	22599.5	18742.6	10821	16157.7	1.142	0.697556	36077.5
385	1790.63	12154.5	22994.3	19073.9	10942.6	16424.1	1.151	0.712771	36719.4
386	1775.84	12168.6	23490.8	19351.7	11114.4	16645.6	1.159	0.727063	37539.1
387	1857.47	12545	23876.4	19678.1	11384.6	16844.6	1.167	0.742278	38198.1
388	1882.11	12611.3	24286.8	20143.1	11524.6	17194	1.175	0.757031	39057.8
389	1868.88	12979.4	24847.7	20507.4	11868.5	17473.9	1.182	0.772706	39850
390	1985.86	12954.4	25495.3	20840.1	12242	17631.3	1.191	0.786999	40746.4
391	1905.6	13354.2	25932.1	21247.3	12360.8	18048.8	1.198	0.804979	41741.7
392	1992.31	13603	26442.5	21739.9	12830.9	18070.3	1.208	0.823421	42613.4
393	2062.61	13736.5	26837.1	22114.7	13103.2	18419.9	1.215	0.840018	43251.1
394	2126.72	14079.3	27229.6	22434.6	13451.4	18704.8	1.222	0.856616	44180.8
395	2104.42	14155.8	27603.4	22663.5	13530.4	18875.2	1.23	0.874597	45495.6
396	2115.6	14309.4	28073.2	23156.1	13909	18982.3	1.238	0.894421	46109.1
397	2121.23	14311.1	28817	23438.6	14087.4	19095.8	1.245	0.912402	46668.5
398	2180.69	14675.3	29027.1	23614.7	14359.2	19111.9	1.251	0.931305	47446.6
399	2222.23	14705.4	29517.1	23965.1	14562.6	19208.3	1.257	0.945136	48443.7
400	2227.63	14824.2	29944.3	24309.7	14781.5	19225.8	1.261	0.9645	49502.8
401	2268.76	15085.2	30490.7	24653.6	14944.2	19217.4	1.264	0.976487	50264.7
402	2293.47	15573.6	30916.8	25000.2	15071.2	18973.3	1.266	0.985708	51639.4
403	2341.98	15564.2	31484.6	25536.7	15144	19032.8	1.264	0.997234	52350.4
404	2353.71	15631.5	32046.1	25926.4	15177.6	18826.9	1.262	0.997695	53354.4
405	2410.47	16004	32640.2	26197	15226	18791.4	1.257	1	54341.2
406	2366.58	15980.4	33262.4	26678.6	15297.9	18570.2	1.248	0.99124	54914
407	2444.92	16121.9	33588.3	26992.7	15155.8	18353.1	1.237	0.98248	55472.5
408	2507.94	16289.7	34119.4	27367.5	15077.8	17963.7	1.224	0.966805	55868.5
409	2388.12	16611.6	34458.4	27389	15044.4	17554.5	1.206	0.943292	56208.8
410	2440.74	16664.9	34378.7	27457.2	14677.1	17287.2	1.186	0.918396	56678.9
411	2457.23	16594.4	34631.5	27478.5	14529.8	16852.1	1.164	0.887506	56593.4
412	2409.82	16348.9	34664.7	27406.3	14360.2	16414.4	1.138	0.851544	55938.6
413	2436.32	16376.2	34578.6	27253.2	14185.2	16083.4	1.11	0.812817	55690.9
414	2388.07	16121.5	34586.4	27046.9	13905.7	15771.8	1.077	0.768557	55113.1
415	2277.86	16231.1	34236.4	26717.6	13753.9	15492	1.045	0.726141	54228.2
416	2294.56	16111.1	33771	26441	13483.7	15226.7	1.009	0.680959	53467.9
417	2269.97	15595.5	33485.6	25872.1	13101.6	14903.3	0.971	0.633933	52117.5
418	2197.41	15435.8	32904.6	25313.9	13015.9	14593.5	0.934	0.590595	50859.4
419	2140.16	14946.1	32312.2	24702.4	12717	14482.6	0.899	0.549562	49546.7
420	2065.39	14847.8	31699.3	24137.1	12494.1	14166.5	0.862	0.50899	47692.3
421	1994.22	14191.9	30823.1	23425.9	12157.4	13910.4	0.826	0.470263	45718.4
422	1877.81	13785.5	30055.3	22712.8	11763	13550.5	0.79	0.434302	43886.4
423	1857.52	13549.6	29240.2	21923.9	11487.8	13193.9	0.754	0.399262	42141.8
424	1700.66	12910.9	28311.8	20917.1	11066.4	12796.8	0.72	0.366989	40617.4
425	1687.81	12613.3	27336.6	20289.8	10736.1	12424.5	0.686	0.336561	39101.6
426	1604.08	12168.5	26332.8	19284.3	10408.4	12060.1	0.652	0.307976	37341.2
427	1576.71	11631.5	25717.5	18598	10145.7	11701.9	0.619	0.281236	35398.4
428	1396.91	11144.6	24617.1	17836.1	9788.65	11242.9	0.588	0.257261	33795.6
429	1420.09	10860.3	23760.4	17252.8	9425.73	10884.6	0.558	0.235592	32041.2
430	1252.45	10336	22889.1	16382.6	9192.78	10398.3	0.528	0.215307	30268.3
431	1356.29	9998.76	22090	15628.8	8970.31	10145.3	0.501	0.197787	28933.1
432	1251.9	9616.22	21278.6	14903.2	8625.96	9582.22	0.474	0.181651	27356.8
433	1186.71	9305.27	20576.1	14207.7	8311.26	9294.18	0.448	0.166897	25806.7
434	1177.19	8837.12	19469.7	13541.1	8064.65	8851.69	0.423	0.153066	24727.3
435	1054.79	8674.35	18832.5	12972.6	7746.9	8539.62	0.401	0.141079	23311.5
436	1035.64	8233.78	18069.4	12251.1	7430.37	8155.76	0.379	0.130475	21906.5
437	999.556	7937.87	17270.5	11790	7248.72	7832.71	0.358	0.120332	20722.4
438	952.362	7530.41	16528.3	11135.5	6922.93	7384.46	0.338	0.111111	19526.2
439	862.457	7258.73	15962.9	10670.4	6667.34	7079.2	0.319	0.103273	18527.5
440	874.045	7002.67	15078	10130.7	6386.04	6761.81	0.301	0.0958967	17414.2
441	826.324	6618.29	14513.4	9627.9	6175.76	6403.62	0.286	0.0894421	16511.5
442	785.106	6409.68	13928	9040.81	5885.61	6073.85	0.271	0.0839096	15580.7
443	775.789	6102.85	13467.2	8604.04	5684.58	5767.29	0.257	0.0783771	14602.6
444	682.78	5868.83	12945.9	8209.18	5490.14	5507.61	0.244	0.0737667	14062.1
445	706.852	5762.62	12486.4	7824.71	5293.98	5332.66	0.233	0.0696173	13283.4
446	706.389	5549.77	12018.4	7514.87	5131.75	5104.75	0.222	0.065468	12729.3
447	662.91	5398.39	11712.6	7239.38	4944	4917.49	0.211	0.0622407	12161.6
448	614.749	5178.79	11322.3	6906.31	4761.97	4764.81	0.202	0.0590134	11847.9
449	585.098	4971.15	10901.7	6526.17	4718.58	4561.55	0.193	0.0562471	10969.6
450	594.641	4680.53	10520.1	6239.29	4593.55	4325.09	0.185	0.0539419	10663.9
451	549.72	4473.4	10197.2	6007.66	4410.81	4271.91	0.178	0.0516367	10106.8
452	535.458	4238.96	9904.3	5751.14	4277.57	4074.82	0.172	0.0497925	9739.16
453	514.771	4022.75	9515.18	5496.37	4191.2	3982.11	0.165	0.0479484	9306.96
454	483.377	3971.77	9190.96	5158.8	4069.73	3821.9	0.16	0.0465652	9137.62
455	467.39	3865.96	8833.77	4955.19	3987.75	3695	0.154	0.0451821	8910.61
456	493.34	3714.76	8707.48	4766.22	3891.86	3604.99	0.149	0.043799	8666.39
457	472.569	3558	8404.88	4534.9	3857	3547.37	0.145	0.0424159	8461.56
458	418.509	3356.71	8171.25	4387.9	3720.91	3456.13	0.141	0.0414938	8105
459	419.363	3278.55	8029.07	4170.23	3747.9	3416.46	0.137	0.0405717	8055.48
460	407.413	3251.82	7856.7	4076.51	3697.84	3418.96	0.133	0.0396496	7923.34
461	380.048	3086.95	7766.13	3955.41	3724.38	3398.36	0.129	0.0387275	7728.69
462	371.37	2922.13	7682.78	3846.02	3703.77	3434.61	0.126	0.0382665	7551.18
463	369.942	2936.38	7555.2	3714.71	3760.44	3378	0.123	0.0378054	7463.45
464	354.118	2810.12	7348.44	3587.1	3674.9	3381.25	0.12	0.0368834	7535.77
465	362.717	2714.73	7174.96	3478.2	3595.7	3391.34	0.117	0.0368834	7467.11
466	334.479	2586.02	7048.92	3299.84	3579.12	3344.51	0.115	0.0364223	7262.82
467	341.973	2574.45	6916.15	3248	3574.16	3356.9	0.113	0.0364223	7082.19
468	312.429	2385.92	6823.84	3130.7	3568.09	3411.07	0.111	0.0364223	7024.41
469	310.813	2328.72	6728.86	3012.87	3476.02	3399.28	0.109	0.0364223	6827.46
470	291.672	2210.12	6572.93	2876.41	3454.51	3395.45	0.107	0.0364223	6795.22
471	277.48	2200.61	6345.37	2840.15	3410.16	3354.59	0.106	0.0368834	6819.84
472	283.198	2117.52	6139.05	2684.62	3327.39	3342.81	0.105	0.0368834	6696.5
473	271.114	2032.4	6055.43	2617.2	3277.26	3349.43	0.103	0.0373444	6877.4
474	264.876	1959.73	6002.26	2569.45	3316.74	3453.97	0.102	0.0378054	6667.8
475	242.452	1905.43	5995.38	2547.27	3402.33	3559.66	0.102	0.0378054	6811.29
476	276.914	1942.89	5991.24	2523.9	3389.27	3628.58	0.101	0.0382665	6905.95
477	241.152	1904.81	6058.98	2436.15	3436.13	3782.3	0.1	0.0382665	7062.63
478	269.074	1943.08	6006.63	2450.02	3519.35	3913.55	0.1	0.0387275	7194.01
479	286.168	1874.72	6080.3	2413.78	3503.67	4015.79	0.1	0.0391886	7288.11
480	238.281	1835.18	6091.21	2406.72	3602.03	4118.09	0.1	0.0396496	7365.6
481	247.527	1819.18	6059	2426.06	3687.32	4278.67	0.1	0.0401107	7233.17
482	248.955	1753.87	6066.65	2383.15	3706.71	4412.4	0.1	0.0405717	7328.12
483	250.253	1737.11	6190.95	2404.77	3735.34	4571.3	0.101	0.0419548	7399.54
484	224.048	1693.73	6073.47	2370.18	3813.36	4667.41	0.102	0.0428769	7403.59
485	238.849	1661.63	6088.41	2348.56	3854.49	4792	0.103	0.0447211	7696.2
486	221.812	1653.63	6093.84	2330.4	3930.33	5062.89	0.104	0.0465652	8006.05
487	229.008	1644.54	6118.05	2348.35	3945.58	5255.47	0.106	0.0488704	8231.85
488	262.317	1687.75	6157.39	2370.92	4039.57	5418.95	0.108	0.0511757	8586.23
489	227.387	1703.4	6195.98	2393.42	4113.76	5658.69	0.11	0.0539419	9099.99
490	249.899	1697.06	6281.72	2424.53	4189.88	5899.77	0.112	0.0567082	9329.38
491	240.369	1735.78	6366.61	2460	4268.86	6074.4	0.114	0.0594744	9537.2
492	255.188	1657.61	6397.88	2463.11	4400.22	6273.19	0.116	0.0631627	9819.13
493	223.817	1695.28	6451.63	2472.48	4543.83	6587.32	0.119	0.06639	10152.8
494	213.993	1695.18	6526.41	2490.64	4528.2	6762.21	0.121	0.0696173	10422.2
495	225.917	1654.08	6523.82	2485.38	4581.43	6939.55	0.124	0.0728446	10799.7
496	245.334	1701.4	6572.59	2486.55	4663.05	7050.7	0.126	0.076533	11488.4
497	250.854	1704.98	6646.8	2550.8	4707.15	7268.64	0.129	0.0802213	11753.2
498	243.708	1780.89	6612.49	2534.23	4844.97	7434.11	0.131	0.0839096	12136.7
499	260.792	1717.39	6737.92	2599.43	4942.85	7533.52	0.133	0.0866759	12489
500	241.059	1731.82	6837.55	2658.24	5048.02	7731.75	0.135	0.0894421	12802.1
501	269.426	1778.72	6894.18	2636.97	5039.31	7785.03	0.137	0.0922084	13306.1
502	263.41	1769.13	7044.31	2659.84	5073.71	7896.82	0.138	0.0940526	13451.5
503	256.175	1773.19	7017.01	2718.9	5102.12	7768.18	0.139	0.0958967	13623.2
504	255.618	1781.2	6962.27	2722.91	5141.87	7799.97	0.14	0.0963578	13784.8
505	256.326	1732.52	7061.66	2748.1	5108.37	7693.27	0.14	0.0954357	13855.3
506	268.38	1699.96	7065.77	2722.76	5104.87	7501.68	0.14	0.0945136	13673.4
507	265.417	1685.32	7035.36	2735.79	4998.72	7370.52	0.139	0.0926694	13688.4
508	264.098	1741.46	6965.26	2701.66	5003.93	7207.06	0.138	0.0908253	13451.6
509	258.341	1675.55	6900.71	2673.03	4871.6	6962.37	0.136	0.088059	13216.9
510	250.694	1679.56	6879.06	2610.1	4816.38	6688.78	0.134	0.0848317	12880.3
511	257.043	1627.95	6868.33	2574.35	4814.78	6499.08	0.131	0.0806823	12744.7
512	231.477	1674.26	6679.48	2585.5	4656.88	6242.75	0.128	0.0760719	12196.8
513	254.322	1603.75	6752.19	2516.78	4621.34	6026.88	0.124	0.0714615	11864.8
514	231.346	1557.03	6682.02	2490.21	4484.99	5790.45	0.121	0.06639	11367.1
515	221.506	1532.66	6646.14	2456.92	4462.89	5552.12	0.117	0.0613186	10773
516	211.153	1573.57	6475.94	2399.81	4366.85	5332.05	0.113	0.0562471	10124.7
517	214.33	1502.26	6372.13	2389.85	4400.91	5175.24	0.109	0.0516367	9745.12
518	199.481	1423.12	6292.21	2289.9	4348.93	4970.43	0.106	0.0474873	9299.01
519	224.532	1414.82	6174.3	2242.4	4301.19	4973.07	0.103	0.043799	8623.51
520	182.297	1420.36	6061.91	2252.59	4202.35	4880.73	0.1	0.0410327	8363.51
521	185.052	1341.92	6022.02	2156.47	4259	4828.06	0.098	0.0387275	8031.45
522	173.117	1405.3	5952.09	2132.39	4251.94	4829.64	0.096	0.0373444	7687.63
523	186.913	1314.93	5820.39	2060.67	4316.41	4859.26	0.095	0.0364223	7515.52
524	171.036	1269.43	5749.31	1986.64	4287.17	5014.59	0.094	0.0364223	7413.73
525	171.026	1316.95	5661.38	1998.38	4286.31	5063.43	0.094	0.0368834	7527.79
526	172.233	1310.42	5698.99	1954.1	4347.59	5176.16	0.094	0.0382665	7489.81
527	174.544	1257.29	5646.84	1935.54	4429.44	5375.36	0.095	0.0401107	7677.9
528	201.61	1204.91	5599.92	1935	4559.64	5424.58	0.096	0.0424159	7943.87
529	183.474	1191.86	5668.01	1915.13	4635.7	5574.73	0.097	0.0456432	8424.2
530	186.181	1186.23	5644.83	1873.77	4676.09	5765.78	0.099	0.0488704	8718.54
531	197.598	1196.52	5687.79	1872.78	4828.65	5949.18	0.1	0.0525588	9040.28
532	198.748	1239.38	5618.74	1871.07	4838.99	6064.64	0.102	0.0567082	9427.74
533	179.883	1191.34	5553.69	1921.94	4864.23	6227.87	0.104	0.0603965	9947.77
534	193.842	1184.29	5712.83	1896.49	4879.38	6292.86	0.106	0.0640848	10280.4
535	205.802	1254.03	5726.47	1889.92	4970.65	6435.97	0.107	0.0668511	10705.2
536	194.809	1193.25	5739.12	1946.04	5036.96	6422.59	0.109	0.0691563	11013.5
537	192.001	1243.28	5734.12	1888.07	5058.01	6341.41	0.11	0.0710005	11152.9
538	197.818	1259.93	5770.89	1931.88	4977.92	6250.26	0.11	0.0719225	11449.6
539	200.77	1268.95	5829.56	1969.42	4987.07	6088.55	0.11	0.0714615	11518.6
540	194.403	1261.7	5799.59	1960.85	5008.12	5963.69	0.109	0.0705394	11536.6
541	189.013	1269.15	5846.74	1994.89	4937.42	5812.08	0.108	0.0686953	11338.1
542	179.073	1263.61	5857.33	2009.75	4961.71	5612.21	0.107	0.06639	10988.2
543	178.076	1299.74	5936.91	2073.48	4898.06	5454.32	0.105	0.0631627	10808.3
544	192.912	1283.3	5932.79	2005.15	4784.36	5244.11	0.102	0.0590134	10413.6
545	196.993	1328.54	5851.39	2011.31	4810.43	5096.83	0.1	0.0534809	9919.96
546	186.687	1295.78	5879.95	2062.5	4735.27	4846.47	0.097	0.0488704	9532.9
547	169.89	1300.87	5935.94	2015.27	4766.36	4792.07	0.094	0.043799	8861.36
548	170.51	1351.16	5902.79	2060.9	4770.51	4696.53	0.091	0.0391886	8492.85
549	184.775	1269.71	5826.88	2061.68	4734.79	4686.45	0.089	0.0355002	8021.28
550	179.055	1333.81	5820.16	2087.99	4696.97	4637.62	0.086	0.0318119	7696.84
551	193.106	1322	5831.79	2056.96	4813.44	4628.72	0.083	0.0290456	7406.77
552	182.972	1324.44	5881.87	2046.65	4809.5	4652.72	0.081	0.0267404	7163.72
553	180.545	1342.28	5835.99	2070.42	4914.26	4725.88	0.079	0.0248963	6812.74
554	197.295	1347.32	5779.59	2082.26	4874.69	4774.28	0.076	0.0235131	6678.16
555	183.747	1281.2	5727.9	1992.75	4952.16	4883.85	0.074	0.02213	6436.84
556	187.947	1366.04	5691.41	2004.14	4996.18	4982.21	0.073	0.0212079	6468.99
557	172.18	1304.79	5705.25	1986.1	5104.54	5108.46	0.071	0.0202858	6342.63
558	181.764	1317.22	5613.62	1929.11	5164.14	5257.7	0.069	0.0198248	6387.73
559	193.333	1346.31	5551.46	1907.76	5281.53	5503.87	0.068	0.0198248	6348.41
560	189.523	1356.77	5506.95	1931.82	5320.75	5569.26	0.067	0.0198248	6244.31
561	136.362	1335.64	5499.83	1895.22	5388.29	5688.97	0.066	0.0202858	6336.2
562	186.586	1327.57	5496.47	1859.31	5487.21	5848.54	0.066	0.0207469	6510
563	181.875	1286.08	5442.81	1868.18	5533.38	6029.01	0.065	0.021669	6670.03
564	200.124	1310.07	5414.65	1856.04	5605.43	6126.88	0.066	0.0225911	6877.03
565	206.623	1212.71	5499.98	1858.43	5698.79	6288.68	0.066	0.0235131	6934.93
566	180.788	1242.07	5525.03	1800.71	5683.31	6295.77	0.067	0.0253573	7136.88
567	159.388	1253.6	5487.46	1809.75	5726.6	6287.18	0.069	0.0272015	7426.23
568	175.843	1303.52	5448.07	1837.42	5775.67	6290.55	0.07	0.0290456	7749.96
569	202.297	1311.48	5539.36	1866.6	5804.26	6289.24	0.071	0.0318119	7945.91
570	161.221	1239.04	5507.45	1842.72	5694.6	6260.56	0.073	0.0345781	8432.48
571	176.528	1302.94	5445.6	1865.56	5804.57	6216.81	0.074	0.0373444	8451.16
572	195.915	1257.23	5466.42	1801.16	5789.64	6180.9	0.074	0.0401107	8939.94
573	179.617	1340.12	5612.41	1855.92	5783.79	6054.44	0.075	0.0424159	8996.26
574	178.205	1267.6	5533.15	1857.67	5708.53	5957.1	0.075	0.0433379	9194.86
575	183.842	1232.38	5497.7	1784.21	5727.55	5869.74	0.075	0.043799	9360.3
576	171.243	1299.11	5457.99	1862.18	5648.98	5809.71	0.074	0.0428769	9260.04
577	201.655	1355.27	5529.47	1835.72	5657.84	5802.5	0.074	0.0419548	9008.09
578	167.86	1239.94	5517.83	1822.43	5661.95	5710.23	0.073	0.0405717	9107.2
579	174.467	1256.82	5474.5	1781.72	5714.17	5637.88	0.072	0.0396496	9016.9
580	185.489	1347.98	5337.01	1814.31	5695.24	5444.1	0.071	0.0382665	9000.11
581	175.345	1289.13	5354.36	1858.19	5600.1	5416.31	0.069	0.0373444	8535.91
582	191.943	1187.51	5299.61	1793.45	5666.5	5294.68	0.068	0.0364223	8602.6
583	163.017	1222.79	5203.51	1804.55	5544.11	5107.29	0.066	0.0345781	8163.46
584	176.438	1248.99	5093.88	1737.7	5501.92	5148.89	0.064	0.033195	7930.18
585	160.51	1266.12	5033.04	1757.05	5670.99	5109.65	0.062	0.0318119	7768.92
586	167.652	1197.5	4942.47	1730.45	5516.01	4918.65	0.06	0.0299677	7393.17
587	150.33	1155.05	4916.53	1667.68	5479.03	4914.59	0.058	0.0276625	7097.45
588	160.035	1114.75	4809.3	1680.13	5464.29	4984.5	0.056	0.0258183	6932.37
589	166.462	1111.66	4737.78	1634.34	5430.97	4743.06	0.054	0.0239742	6309.72
590	157.804	1088.91	4656.68	1560.72	5469.96	4735.85	0.052	0.02213	6263.36
591	172.844	1038.96	4506.69	1609.53	5440.11	4690.12	0.05	0.0202858	5658.84
592	152.278	1131.81	4478.38	1520.77	5369.94	4727.39	0.048	0.0189027	5754.71
593	161.584	1060.55	4321.81	1507.31	5368.83	4680.65	0.046	0.0175196	5570.12
594	151.368	1123.25	4326.37	1424.89	5407.18	4605.74	0.045	0.0161365	5145.03
595	154.648	1092.58	4188.82	1394.23	5307.3	4519.69	0.043	0.0152144	4968.87
596	155.211	1008.3	4117.48	1382.44	5290.08	4505.31	0.041	0.0147533	4986.21
597	145.56	1054.75	4000.26	1293.15	5274.1	4548.24	0.04	0.0138313	4782.91
598	130.496	1041.63	3956.26	1323.93	5338.18	4482.83	0.039	0.0133702	4734.45
599	109.795	1022.44	3892.28	1311.83	5258.32	4411.6	0.038	0.0133702	4645.79
600	95.2205	920.476	3838.96	1232.53	5204.31	4383.54	0.037	0.0129092	4432.02
601	134.971	940.443	3722.22	1215.18	5204.75	4369.55	0.036	0.0129092	4447.11
602	140.288	979.06	3592.22	1184.91	5192.47	4413.39	0.035	0.0129092	4388.08
603	106.338	950.557	3579.86	1121.03	5283.99	4417.64	0.034	0.0124481	4412.34
604	119.779	843.552	3515.89	1150.86	5158.68	4494	0.033	0.0124481	4143.14
605	141.671	921.41	3591.19	1113.61	5252.56	4538.21	0.033	0.0119871	4190.2
606	142.715	846.913	3413.44	1142.14	5264.59	4463.04	0.032	0.011526	4136.21
607	121.436	890.392	3377.72	1141.52	5184.57	4625.43	0.031	0.011065	3887.05
608	126.862	887.267	3312.04	1099.42	5226.13	4657.37	0.03	0.010604	3873.81
609	147.825	869.565	3301.95	1033.66	5317.57	4753.09	0.03	0.0101429	3949.61
610	127.274	913.281	3334.71	1049.7	5325.71	4997.94	0.03	0.0101429	3982.45
611	123.863	851.539	3276.28	1044.87	5362.28	5100.14	0.029	0.0101429	3991.34
612	115.928	908.613	3225.58	1042.54	5510.25	5199.87	0.029	0.0101429	3930.87
613	119.759	866.329	3233.57	1038.42	5534.25	5179.62	0.029	0.0101429	3962.26
614	111.729	882.832	3293.97	1041.35	5513.46	5448.65	0.029	0.010604	4109.81
615	162.118	855.007	3180.71	1024.01	5595.79	5618.14	0.03	0.011065	4193.79
616	122.56	894.646	3251.64	1082.62	5664.7	5719.33	0.03	0.011526	4374.08
617	108.336	850.831	3247.99	1035.33	5777.57	5823.52	0.031	0.0124481	4417.93
618	115.632	864.584	3283.13	1036.96	5691.75	6068.29	0.032	0.0129092	5019.8
619	96.5943	854.422	3366.79	1065.9	5753.92	5958.73	0.033	0.0138313	4943.33
620	113.407	873.143	3323.43	1092.03	5886.34	6085.52	0.034	0.0147533	5320.09
621	108.507	888.181	3412.73	1091.26	5850.77	6199.5	0.036	0.0161365	5302.17
622	116.548	951.166	3439.83	1111.36	5851.79	6259.14	0.037	0.0175196	5617.43
623	156.081	921.568	3584.85	1144.72	5899.54	6162.28	0.038	0.0189027	5847.84
624	156.844	933.864	3572.01	1196.3	5916.31	5910.26	0.04	0.0207469	6248.02
625	115.28	934.69	3679.33	1177.57	5861.95	6016.56	0.04	0.0225911	6370.86
626	120.291	975.635	3711.79	1191.91	5952.96	5950.93	0.041	0.0248963	6757.96
627	144.604	1056.17	3579.03	1203.37	6011.69	5887.44	0.042	0.0267404	7159.81
628	152.21	1093.3	3746.46	1246.13	6074.31	5934.4	0.042	0.0290456	7368.68
629	159.719	1119.4	3811.79	1337.66	6041.51	6060.9	0.042	0.0299677	7415.71
630	171.426	1076.19	3819.11	1354.58	6193.61	6115.27	0.042	0.0304288	7425.49
631	161.135	1138.15	3877.6	1336.09	6221.21	6103.21	0.042	0.0295067	7633.06
632	182.76	1112.78	3970.83	1423.89	6268.28	6138.05	0.041	0.0272015	7224.59
633	203.252	1205.33	3922.7	1427.9	6398.64	6291.82	0.04	0.0244352	7186.03
634	178.096	1051.4	3971.44	1404.9	6395.91	6433.89	0.039	0.021669	6818.8
635	149.692	1151.44	3993.71	1472.79	6339.38	6444.51	0.038	0.0184417	6554.08
636	154.808	1234.79	4045.37	1587.24	6347.83	6268.89	0.037	0.0156754	5889.4
637	166.199	1204.77	4108.92	1614.57	6291.43	6452.25	0.036	0.0138313	5904.68
638	158.811	1285.19	4194.4	1651.77	6373.22	6488.37	0.035	0.0119871	5535.95
639	175.218	1276.33	4218.03	1642.06	6391.54	6332.36	0.034	0.010604	5396.65
640	161.701	1362.39	4331.99	1705.25	6233.05	6457.73	0.034	0.00922084	5280.36
641	151.79	1254.46	4364.99	1766.21	6195.71	6333.18	0.033	0.0087598	5283.62
642	192.428	1348.13	4423.33	1751.19	6299.31	6286.88	0.032	0.00783771	5144.35
643	196.538	1391.97	4413.92	1811.35	6030.85	6244.71	0.032	0.00737667	5147.22
644	231.599	1564.53	4448.22	1892.85	5990.65	6017.23	0.031	0.00691563	5038.84
645	191.027	1519.3	4475.55	1863.12	5795.92	5985.03	0.03	0.00645459	5033.11
646	173.577	1510.77	4464.18	1911.05	5698.82	5851.57	0.03	0.00599355	5170.41
647	220.223	1419.61	4412.51	1835.43	5573.12	5647.54	0.029	0.00599355	5224.44
648	197.404	1623.45	4459.04	1797.87	5386.89	5483.45	0.028	0.0055325	5042.03
649	216.031	1571.31	4362.86	1820.75	5371.41	5335.26	0.027	0.0055325	5143.23
650	236.087	1592.46	4308	1824.55	5251.79	5284.33	0.026	0.00507146	4900.49
651	204.649	1636.78	4237.06	1836.63	5064.69	5008.96	0.025	0.00507146	4926.45
652	160.396	1560.39	4153.73	1751.94	4909.09	4879.59	0.024	0.00461042	4996.53
653	198.772	1425.26	4233.65	1801.87	4900.97	4938.63	0.023	0.00461042	5004.24
654	203.485	1420.89	3977.5	1707.15	4839.29	4850.02	0.021	0.00461042	4883.9
655	198.137	1472.68	3945.02	1845.92	4677.75	4724.01	0.02	0.00414938	4924.47
656	158.662	1339.36	4053.46	1717.98	4738.42	4693.49	0.019	0.00414938	4751.51
657	209.693	1536.56	3883.36	1827.79	4690.41	4518.14	0.018	0.00414938	4691.96
658	160.335	1483.69	3876.96	1790.23	4562.56	4449.98	0.017	0.00414938	4985.61
659	213.202	1485.99	3912.01	1783.61	4568.77	4449.31	0.016	0.00368834	4786.73
660	191.902	1456.82	3784.21	1734.69	4424.97	4483.48	0.014	0.00368834	4833.54
